# Supplementary material
Source: publisher figshare collection journal article supplement (https://sage.figshare.com/ndownloader/files/18028076)
Supplement: Supplementary file 1 [file 18028076]

# **Structural Design and Characterization of Highly Elastic Woven Fabric Containing Helical Auxetic Yarns**

## **Acknowledgments and funding**

This work is jointly supported by “the Fundamental Research Funds for the Central Universities(2232018G-01)”, by the National Key Research and Development Program of China (Grant No.2016YFC0802802), by the Fundamental Research Funds for the Central Universities and Graduate Student Innovation Fund of Donghua University (CUSF-DH-D-2019056) and by the Open Project Program of Key Lab for Sport Shoes Upper Materials of Fujian Province (Fujian Huafeng New Material Co., Ltd.) of China (No. KLSSUM1902).
